# Supplementary material for: Photovoltaic effect in a few-layer ReS2/WSe2 heterostructure
Source: Royal Society of Chemistry journal article supplement (doi:10.1039/c8nr07219a), 2018-01-01
Supplement: c8nr07219a1.pdf [file c8nr07219a1.pdf]

## SUPPORTING INFORMATION

### Photovoltaic Effect in Few-Layer ReS<sub>2</sub>/WSe<sub>2</sub> Heterostructure

*Chulho Park,<sup>a</sup> Ngoc Thanh Duong,<sup>a,b</sup> Seungho Bang,<sup>a,b</sup> Duc Anh Nguyen,<sup>a</sup> Hye Min Oh<sup>\*a</sup> and  
Mun Seok Jeong<sup>\*a,b</sup>*

<sup>a</sup>Department of Energy Science, Sungkyunkwan University, Suwon 16419, Republic of Korea

<sup>b</sup>Center for Integrated Nanostructure Physics (CINAP), Institute for Basic Science (IBS),  
Sungkyunkwan University, Suwon 16419, Republic of Korea

*\*Email: [mjeong@skku.edu](mailto:mjeong@skku.edu), [ohmin@skku.edu](mailto:ohmin@skku.edu)*

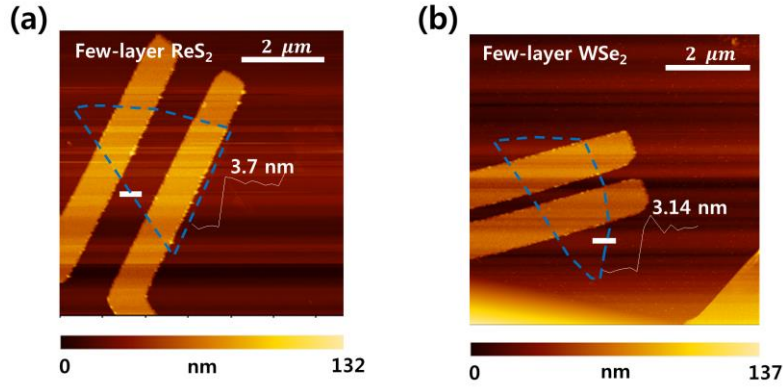

**Figure S1.** AFM images of the (a) few-layer  $\text{ReS}_2$  transistor and (b) few-layer  $\text{WSe}_2$  transistor. The thicknesses of few-layer  $\text{ReS}_2$  and  $\text{WSe}_2$  transistors are approximately 3.3 and 3.5 nm, respectively.

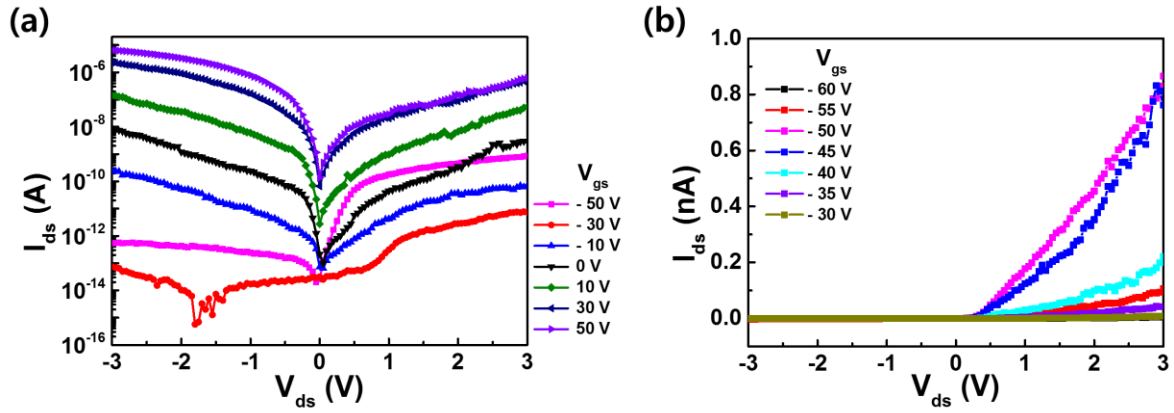

**Figure S2.** Gate dependence of the few-layer  $\text{ReS}_2/\text{WSe}_2$  heterostructure. (a) Log  $I_{\text{ds}}-V_{\text{ds}}$  curve depending on the gate-bias, in the range of -50 V to 50 V. (b)  $I_{\text{ds}}-V_{\text{ds}}$  curve in the p-n junction regime (-60 V <  $V_{\text{gs}}$  < -30 V). At  $V_{\text{gs}} = -50$  V, the few-layer  $\text{ReS}_2/\text{WSe}_2$  heterostructure shows the highest rectification behavior.

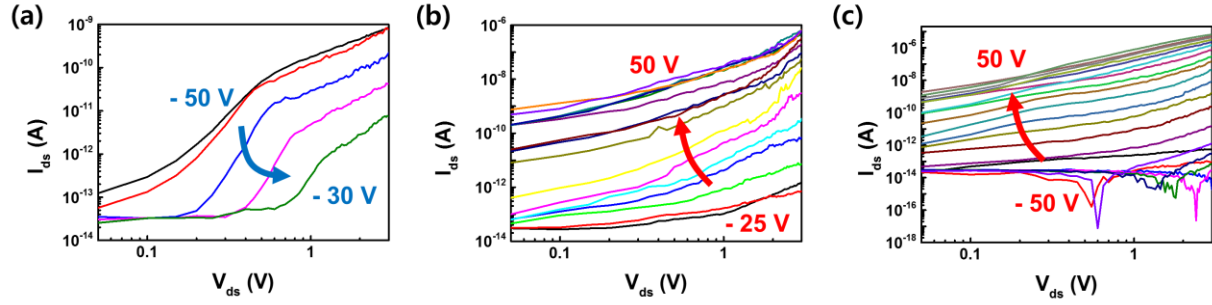

**Figure S3.** Electrical properties of the few-layer  $\text{ReS}_2/\text{WSe}_2$  heterostructure. (a) Log  $I_{ds}$ –log  $V_{ds}$  curve of the forward bias in the p-n junction regime ( $V_{gs} = -50$  to  $-30$  V) and in the n-n junction regime ( $V_{gs} = -25$  to  $50$  V). (c) Log  $I_{ds}$ –log  $V_{ds}$  curve of the reverse bias depending on the gate bias. In the forward bias of the p-n junction regime, the few-layer  $\text{ReS}_2/\text{WSe}_2$  heterostructure has a rapid current increase section only.

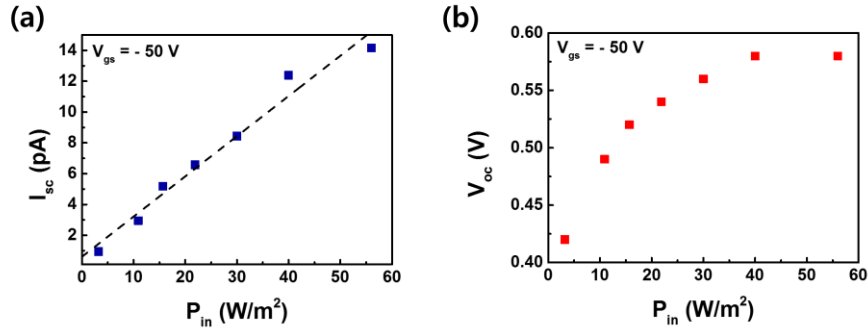

**Figure S4.** Optoelectronic properties of the few-layer  $\text{ReS}_2/\text{WSe}_2$  heterostructure. (a) Short-circuit current ( $I_{sc}$ ) and (b) open-circuit voltage ( $V_{oc}$ ) with respect to the incident power of the  $405\text{-nm}$  laser.  $I_{sc}$  exhibits a linear increase, and  $V_{oc}$  is saturated with incident power, as  $I_{sc}$  and  $V_{oc}$  are related to the illumination intensity and bandgap, respectively.

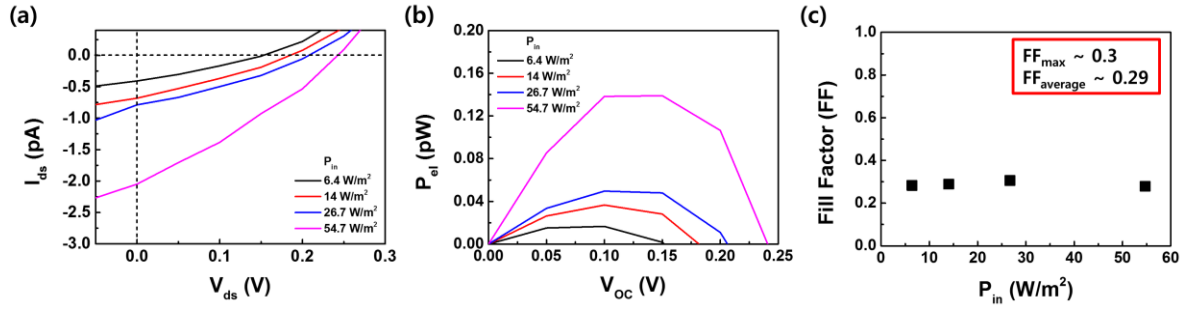

**Figure S5.** (a) Photovoltaic effect of the few-layer  $ReS_2$ /monolayer  $WSe_2$  heterostructure. (b) Electrical power ( $P_{el}$ ) with an incident laser power ( $P_{in}$ ). (c) Fill factor with respect to  $P_{in}$ . All of measurement were conducted at -50 V gate bias with 405-nm laser. Although both layers have direct band gap, it exhibits low fill factor compared with few-layer  $ReS_2/WSe_2$  heterostructure. Because this structure has very low short circuit current. Therefore, we assume that monolayer has not enough absorbing layer due to ultrathin thickness.
